# Supplementary material for: Type 2 diabetes seems not to be a risk factor for the carpal tunnel syndrome: a case control study
Source: PubMed Central journal article supplement (PMC4210523; doi:10.1186/1471-2474-15-346), 2014-10-14
Supplement: 12891_2014_2284_MOESM1_ESM.pdf [file 12891_2014_2284_MOESM1_ESM.pdf]

1482 patients evaluated

765 patients evaluated

485 patients excluded:

- Diagnose CTS before 2011: 144
- No typical CTS symptoms: 256
- No NCS performed: 35
- Diagnostic process in other hospital: 7
- Other forms of diabetes: 17
- No correspondence: 26

171 patients excluded:

- Recidive HNP operation: 87
- No HNP: 29
- Operation outside study period: 4
- CTS diagnosis: 36
- No correspondence: 15

997 patients included

594 patients included
